# Supplementary material for: Epiretinal Amniotic Membrane Influences the Cellular Behavior of Profibrotic Dedifferentiated Cells of Proliferative Vitreoretinopathy In Vitro
Source: Hindawi journal article supplement (doi:10.1155/2023/8820844), 2023-10-18

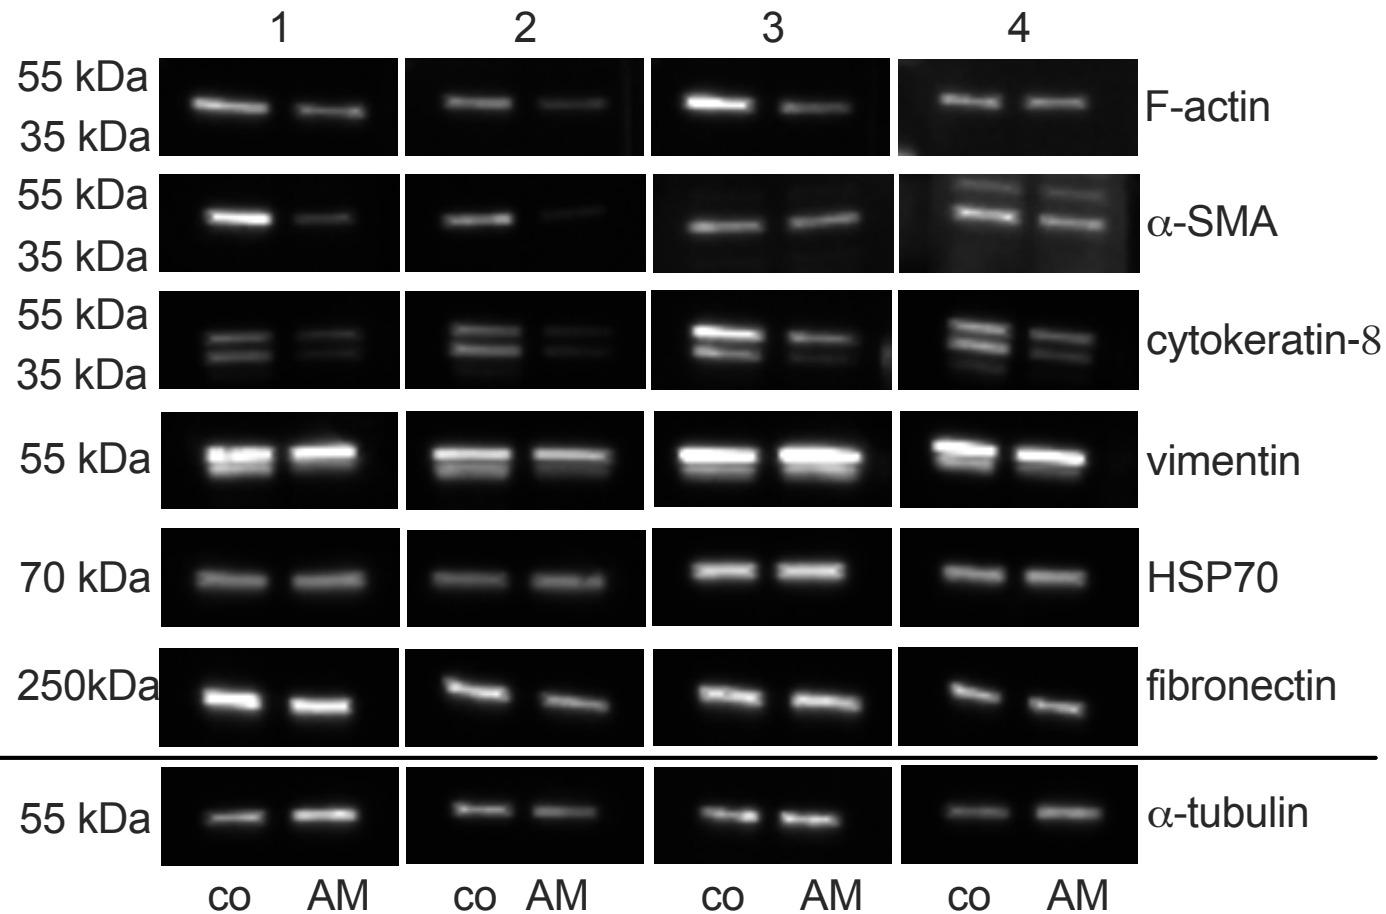

Supplement: f1 [file 8820844.f1.pdf]
